# Supplementary material
Source: MDPI journal article supplement (https://www.mdpi.com/2311-7524/9/8/948)
Supplement: s1 [file s1]

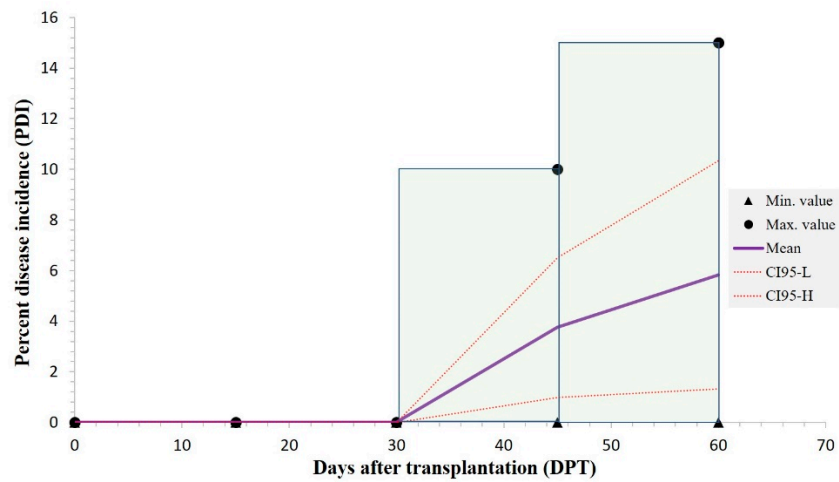

**Supplementary Figure S1. Area under the disease progress curve (AUDPC) over time at Grady County:** Seven different cultivars with four replications and 10-10 plants from each cultivar was used. The data were collected at 15 days of time interval at Grady County, Georgia. Blue color dashed line indicates the disease progress curve. Blue rectangular box is used to calculate AUDPC based on disease severity recorded on each plot at every 15 days of time interval. The percent disease ratings were calculated based on number of plants showing phenotypic symptoms out of the total number of plants per plot/replication. The mean and maximum values are shown with the black color triangle and circle, respectively.

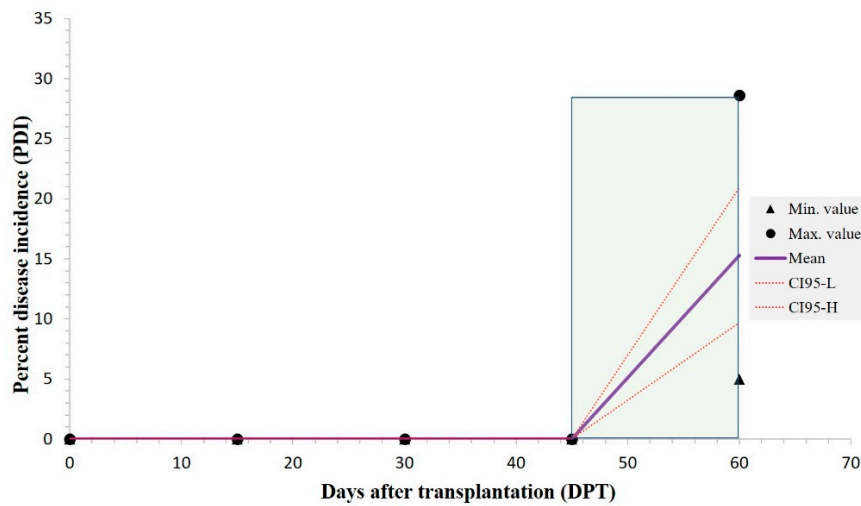

**Supplementary Figure S2. Area under the disease progress curve (AUDPC) over time:** Seven different cultivars with four replications and 10-10 plants from each cultivar was used. The data were collected at 15 days of time interval at Colquitt County, Georgia. Blue color dashed line indicates the disease progress curve. Blue rectangular box is used to calculate AUDPC based on disease severity recorded on each plot at every 15 days of time interval. The percent disease ratings were calculated based on number of plants showing phenotypic symptoms out of the total number of plants per plot/replication. The mean and Maximum values are shown with the black color triangle and circle, respectively.

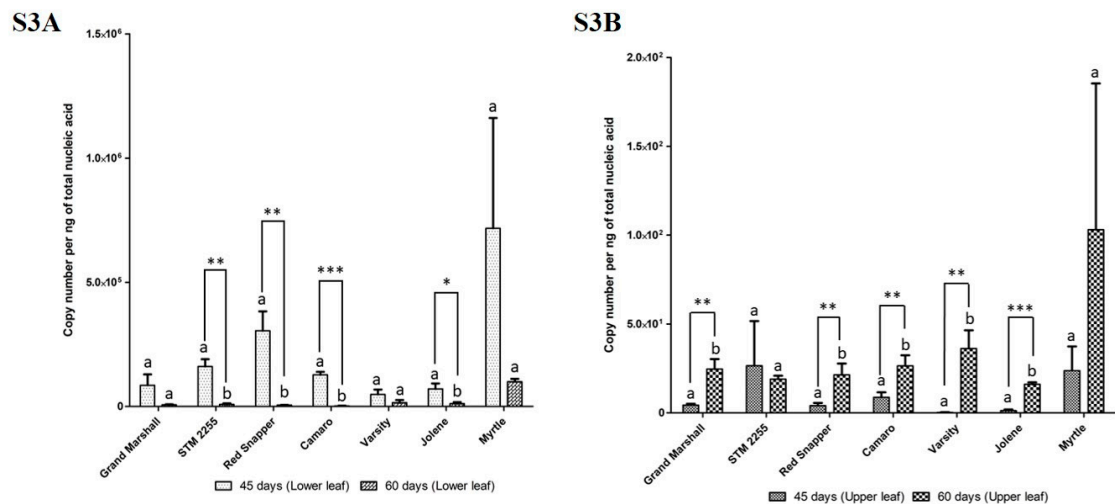

**Supplementary Figure S3. Quantification (qPCR) of virus copy number in symptomatic tomato plants with tomato yellow leaf curl virus (TYLCV) and tomato chlorosis virus (ToCV) at 45 and 60 DPT.** TYLCV copy number were quantified in from the lower foliage of symptomatic tissues (Fig. S3A), while for ToCV it was in the top second leaves (Fig. S3B) and samples were pooled from at least five individual plants. The graphs represent an average of four replicates form each variety. Y-axis represent virus copy number per ng of total nucleic acid, x-axis showed tomato varieties used in this study. \*\*\* indicates  $p$  value 0.0001-0.001, \*\* indicates  $p$  value 0.001-0.01, \* indicates  $p$  value 0.01-0.05, ns  $\geq 0.05$  not significant. Significant differences are indicated using different lower-case letters.

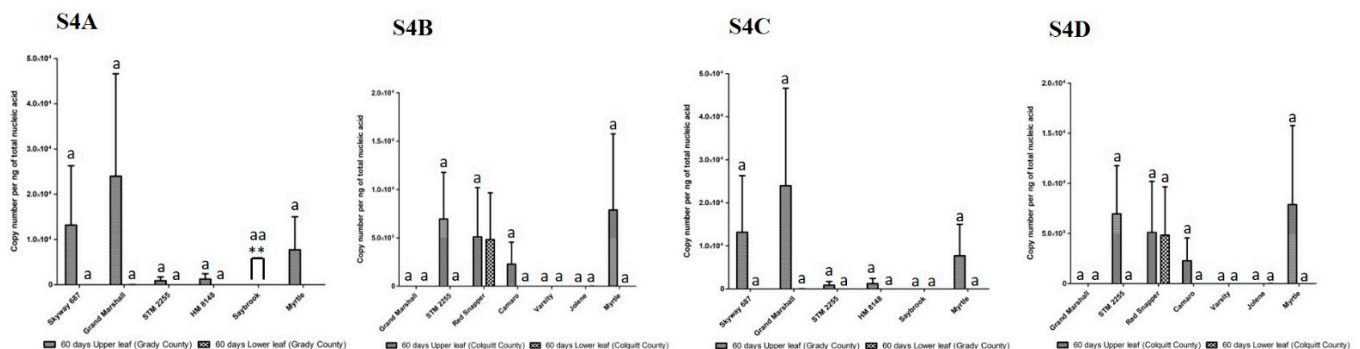

**Supplementary Figure S4. Quantification (qPCR) of virus copy number in symptomatic tomato plants with tomato yellow leaf curl virus (TYLCV) and tomato chlorosis virus (ToCV) at Grady and Colquitt County after 45 and 60 DPT.** TYLCV copy number were quantified from the in the top second of symptomatic tissues (Fig. S4A and Fig. S4B), while for ToCV it was in the lower foliage (Fig. S4C and Fig. S4D) at Grady and Colquitt County, respectively. The samples were pooled from at least five individual plants. The graphs represent an average of four replicates form each variety. Y-axis represent virus copy number per ng of total nucleic acid, x-axis showed tomato varieties used in this study. \*\*\* indicates  $p$  value 0.0001-0.001, \*\* indicates  $p$  value 0.001-0.01, \* indicates  $p$  value 0.01-0.05, ns  $\geq 0.05$  not significant. Significant differences are indicated using different lower-case letters.

**Supplementary Table S1:** Statistics analysis for TYLCV (45 days Vs 60 days) performed by XLSTAT using ANOVA and Tukey (HSD) test with 95% of confidence interval.

| Days / Tukey (HSD) / Analysis of the differences between the categories with a confidence interval of 95% (Var 1): Grand Marshall |            |                         |                   |                   |             |
|-----------------------------------------------------------------------------------------------------------------------------------|------------|-------------------------|-------------------|-------------------|-------------|
| Contrast                                                                                                                          | Difference | Standardized difference | Critical value    | Pr > Diff         | Significant |
| 45U vs 60U                                                                                                                        | 627.500    | 0.033                   | 2.447             | 0.975             | No          |
| Tukey's d critical value:                                                                                                         |            |                         | 3.46              |                   |             |
| Category                                                                                                                          | LS means   | Standard error          | Lower bound (95%) | Upper bound (95%) | Groups      |
| 45U                                                                                                                               | 44042.500  | 13622.500               | 10709.444         | 77375.556         | A           |
| 60U                                                                                                                               | 43415.000  | 13622.500               | 10081.944         | 76748.056         | A           |
| Days / Tukey (HSD) / Analysis of the differences between the categories with a confidence interval of 95% (Var 2): Red Snapper    |            |                         |                   |                   |             |
| Contrast                                                                                                                          | Difference | Standardized difference | Critical value    | Pr > Diff         | Significant |
| 60U vs 45U                                                                                                                        | 26885.000  | 3.110                   | 2.447             | <b>0.021</b>      | Yes         |
| Tukey's d critical value:                                                                                                         |            |                         | 3.46              |                   |             |
| Category                                                                                                                          | LS means   | Standard error          | Lower bound (95%) | Upper bound (95%) | Groups      |
| 60U                                                                                                                               | 40900.000  | 6112.687                | 25942.794         | 55857.206         | A           |
| 45U                                                                                                                               | 14015.000  | 6112.687                | -942.206          | 28972.206         | B           |
| Days / Tukey (HSD) / Analysis of the differences between the categories with a confidence interval of 95% (Var 3): STM 2255       |            |                         |                   |                   |             |
| Contrast                                                                                                                          | Difference | Standardized difference | Critical value    | Pr > Diff         | Significant |
| 60U vs 45U                                                                                                                        | 73092.500  | 1.615                   | 2.447             | 0.158             | No          |
| Tukey's d critical value:                                                                                                         |            |                         | 3.46              |                   |             |

| Category                                                                                                                   | LS means   | Standard error          | Lower bound (95%) | Upper bound (95%) | Groups      |
|----------------------------------------------------------------------------------------------------------------------------|------------|-------------------------|-------------------|-------------------|-------------|
| 60U                                                                                                                        | 92675.000  | 32009.325               | 14351.006         | 170998.994        | A           |
| 45U                                                                                                                        | 19582.500  | 32009.325               | -58741.494        | 97906.494         | A           |
| Days / Tukey (HSD) / Analysis of the differences between the categories with a confidence interval of 95% (Var 4): Camaro  |            |                         |                   |                   |             |
| Contrast                                                                                                                   | Difference | Standardized difference | Critical value    | Pr > Diff         | Significant |
| 60U vs 45U                                                                                                                 | 26495.500  | 0.576                   | 2.447             | 0.586             | No          |
| Tukey's d critical value:                                                                                                  |            |                         | 3.46              |                   |             |
| Category                                                                                                                   | LS means   | Standard error          | Lower bound (95%) | Upper bound (95%) | Groups      |
| 60U                                                                                                                        | 61095.500  | 32549.057               | -18549.172        | 140740.172        | A           |
| 45U                                                                                                                        | 34600.000  | 32549.057               | -45044.672        | 114244.672        | A           |
| Days / Tukey (HSD) / Analysis of the differences between the categories with a confidence interval of 95% (Var 5): Varsity |            |                         |                   |                   |             |
| Contrast                                                                                                                   | Difference | Standardized difference | Critical value    | Pr > Diff         | Significant |
| 60U vs 45U                                                                                                                 | 14882.500  | 1.802                   | 2.447             | 0.122             | No          |
| Tukey's d critical value:                                                                                                  |            |                         | 3.46              |                   |             |
| Category                                                                                                                   | LS means   | Standard error          | Lower bound (95%) | Upper bound (95%) | Groups      |
| 60U                                                                                                                        | 23567.500  | 5841.099                | 9274.847          | 37860.153         | A           |
| 45U                                                                                                                        | 8685.000   | 5841.099                | -5607.653         | 22977.653         | A           |
| Days / Tukey (HSD) / Analysis of the differences between the categories with a confidence interval of 95% (Var 6): Jolene  |            |                         |                   |                   |             |
| Contrast                                                                                                                   | Difference | Standardized difference | Critical value    | Pr > Diff         | Significant |
| 60U vs 45U                                                                                                                 | 18450.000  | 0.480                   | 2.447             | 0.648             | No          |
| Tukey's d critical value:                                                                                                  |            |                         | 3.46              |                   |             |
| Category                                                                                                                   | LS means   | Standard error          | Lower bound (95%) | Upper bound (95%) | Groups      |
| 60U                                                                                                                        | 66125.000  | 27186.191               | -397.210          | 132647.210        | A           |
| 45U                                                                                                                        | 47675.000  | 27186.191               | -18847.210        | 114197.210        | A           |

| Days / Tukey (HSD) / Analysis of the differences between the categories with a confidence interval of 95% (Var 7): Myrtle |            |                         |                      |                   |             |
|---------------------------------------------------------------------------------------------------------------------------|------------|-------------------------|----------------------|-------------------|-------------|
| Contrast                                                                                                                  | Difference | Standardized difference | Critical value       | Pr > Diff         | Significant |
| 60U vs 45U                                                                                                                | 114375.000 | 2.690                   | 2.447                | <b>0.036</b>      | Yes         |
| Tukey's d critical value:                                                                                                 |            |                         | 3.46                 |                   |             |
| Category                                                                                                                  | LS means   | Standard error          | Lower bound<br>(95%) | Upper bound (95%) | Groups      |
| 60U                                                                                                                       | 212750.000 | 30070.360               | 139170.482           | 286329.518        | A           |
| 45U                                                                                                                       | 98375.000  | 30070.360               | 24795.482            | 171954.518        | B           |

**Supplementary Table S2:** Statistics analysis for ToCV (45 days Vs 60 days) performed by XLSTAT using ANOVA and Tukey (HSD) test with 95% of confidence interval.

| Days / Tukey (HSD) / Analysis of the differences between the categories with a confidence interval of 95% (Var 1): Grand Marshall |            |                         |                   |                   |             |
|-----------------------------------------------------------------------------------------------------------------------------------|------------|-------------------------|-------------------|-------------------|-------------|
| Contrast                                                                                                                          | Difference | Standardized difference | Critical value    | Pr > Diff         | Significant |
| 60L vs 45L                                                                                                                        | 270.953    | 2.254                   | 2.447             | 0.065             | No          |
| Tukey's d critical value:                                                                                                         |            |                         | 3.46              |                   |             |
| Category                                                                                                                          | LS means   | Standard error          | Lower bound (95%) | Upper bound (95%) | Groups      |
| 60L                                                                                                                               | 299.700    | 84.984                  | 91.753            | 507.647           | A           |
| 45L                                                                                                                               | 28.748     | 84.984                  | -179.200          | 236.695           | A           |
| Days / Tukey (HSD) / Analysis of the differences between the categories with a confidence interval of 95% (Var 2): Red Snapper    |            |                         |                   |                   |             |
| Contrast                                                                                                                          | Difference | Standardized difference | Critical value    | Pr > Diff         | Significant |
| 60L vs 45L                                                                                                                        | 14.173     | 0.290                   | 2.447             | 0.781             | No          |
| Tukey's d critical value:                                                                                                         |            |                         | 3.46              |                   |             |
| Category                                                                                                                          | LS means   | Standard error          | Lower bound (95%) | Upper bound (95%) | Groups      |
| 60L                                                                                                                               | 70.125     | 34.521                  | -14.345           | 154.595           | A           |
| 45L                                                                                                                               | 55.953     | 34.521                  | -28.517           | 140.422           | A           |
| Days / Tukey (HSD) / Analysis of the differences between the categories with a confidence interval of 95% (Var 3): STM 2255       |            |                         |                   |                   |             |
| Contrast                                                                                                                          | Difference | Standardized difference | Critical value    | Pr > Diff         | Significant |
| 60L vs 45L                                                                                                                        | 10.175     | 1.522                   | 2.447             | 0.179             | No          |
| Tukey's d critical value:                                                                                                         |            |                         | 3.46              |                   |             |
| Category                                                                                                                          | LS means   | Standard error          | Lower bound (95%) | Upper bound (95%) | Groups      |
| 60L                                                                                                                               | 30.400     | 4.727                   | 18.833            | 41.967            | A           |
| 45L                                                                                                                               | 20.225     | 4.727                   | 8.658             | 31.792            | A           |

| Days / Tukey (HSD) / Analysis of the differences between the categories with a confidence interval of 95% (Var 4): Camaro  |            |                         |                   |                   |             |
|----------------------------------------------------------------------------------------------------------------------------|------------|-------------------------|-------------------|-------------------|-------------|
| Contrast                                                                                                                   | Difference | Standardized difference | Critical value    | Pr > Diff         | Significant |
| 60L vs 45L                                                                                                                 | 112.733    | 2.020                   | 2.447             | 0.090             | No          |
| Tukey's d critical value:                                                                                                  |            |                         | 3.46              |                   |             |
| Category                                                                                                                   | LS means   | Standard error          | Lower bound (95%) | Upper bound (95%) | Groups      |
| 60L                                                                                                                        | 120.835    | 39.460                  | 24.279            | 217.391           | A           |
| 45L                                                                                                                        | 8.103      | 39.460                  | -88.453           | 104.658           | A           |
| Days / Tukey (HSD) / Analysis of the differences between the categories with a confidence interval of 95% (Var 5): Varsity |            |                         |                   |                   |             |
| Contrast                                                                                                                   | Difference | Standardized difference | Critical value    | Pr > Diff         | Significant |
| 60L vs 45L                                                                                                                 | 79.051     | 0.821                   | 2.447             | 0.443             | No          |
| Tukey's d critical value:                                                                                                  |            |                         | 3.46              |                   |             |
| Category                                                                                                                   | LS means   | Standard error          | Lower bound (95%) | Upper bound (95%) | Groups      |
| 60L                                                                                                                        | 116.360    | 68.096                  | -50.266           | 282.986           | A           |
| 45L                                                                                                                        | 37.309     | 68.096                  | -129.317          | 203.935           | A           |
| Days / Tukey (HSD) / Analysis of the differences between the categories with a confidence interval of 95% (Var 6): Jolene  |            |                         |                   |                   |             |
| Contrast                                                                                                                   | Difference | Standardized difference | Critical value    | Pr > Diff         | Significant |
| 60L vs 45L                                                                                                                 | 33.042     | 2.612                   | 2.447             | <b>0.040</b>      | Yes         |
| Tukey's d critical value:                                                                                                  |            |                         | 3.46              |                   |             |
| Category                                                                                                                   | LS means   | Standard error          | Lower bound (95%) | Upper bound (95%) | Groups      |
| 60L                                                                                                                        | 37.182     | 8.944                   | 15.296            | 59.068            | A           |
| 45L                                                                                                                        | 4.140      | 8.944                   | -17.746           | 26.026            | B           |
| Days / Tukey (HSD) / Analysis of the differences between the categories with a confidence interval of 95% (Var 7): Myrtle  |            |                         |                   |                   |             |

| Contrast                  | Difference | Standardized difference | Critical value       | Pr > Diff         | Significant |
|---------------------------|------------|-------------------------|----------------------|-------------------|-------------|
| 60L vs 45L                | 16.393     | 1.116                   | 2.447                | 0.307             | No          |
| Tukey's d critical value: |            |                         | 3.46                 |                   |             |
| Category                  | LS means   | Standard error          | Lower bound<br>(95%) | Upper bound (95%) | Groups      |
| 60L                       | 31.974     | 10.388                  | 6.556                | 57.392            | A           |
| 45L                       | 15.581     | 10.388                  | -9.837               | 40.999            | A           |
